# Supplementary material for: Alginate Conjugation Increases Toughness in Auricular Chondrocyte Seeded Collagen Hydrogels
Source: MDPI journal article supplement (doi:10.3390/bioengineering10091037), 2023-09-04
Supplement: s1 [file s1]

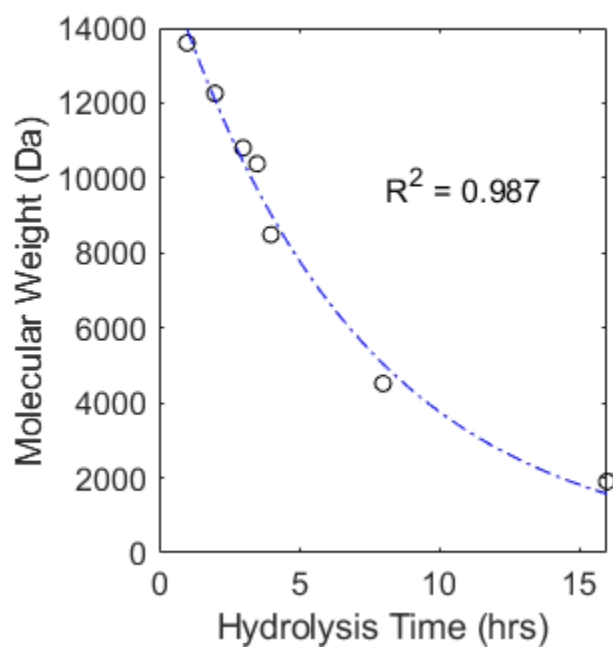

**Figure S1.** Molecular weight of alginate oligomers vs. hydrolysis time at pH 3.5 under nitrogen at 95°C. n = 3 per hydrolysis time condition.

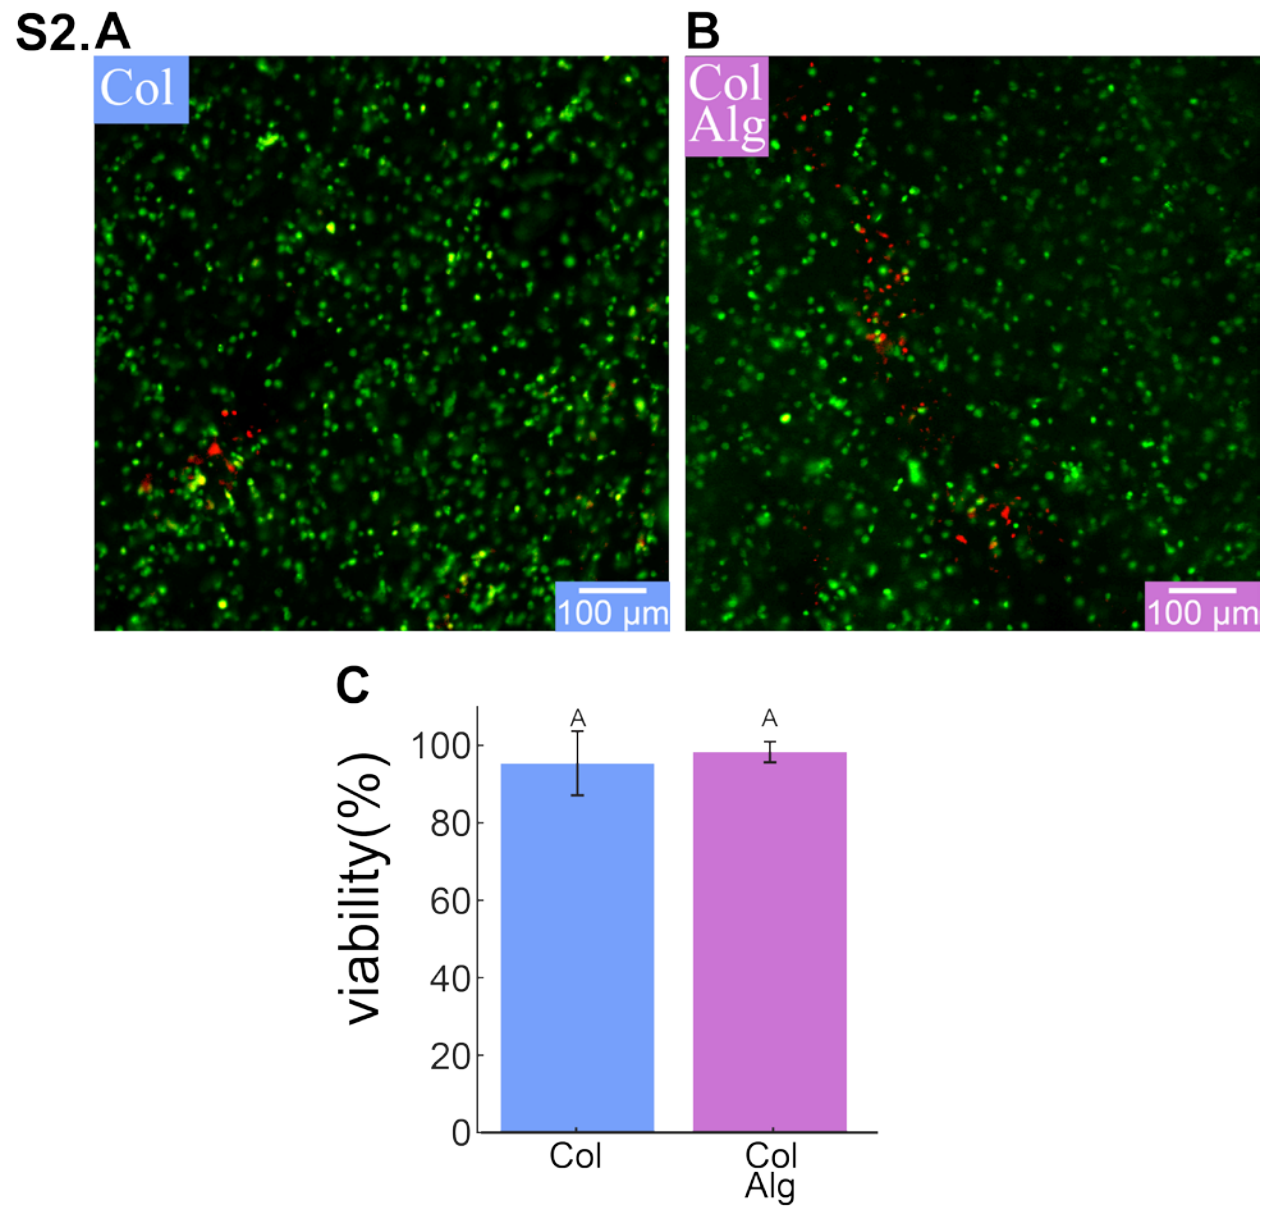

**Figure S2.** Live/dead staining of auricular chondrocyte-seeded Col (**A**) and ColAlg (**B**) gels, with calculated viability of each gel (**C**). n = 10. Shared letters denote no significant difference.
